# Supplementary material for: Analyzing the chemical composition, morphology and size of ice-nucleating particles by coupling a scanning electron microscope to an offline diffusion chamber
Source: Copernicus journal article supplement (doi:10.5194/egusphere-2024-2797), 2024-09-19
Supplement: Supplementary file 1 [file egusphere-2024-2797-supplement.pdf]

*Supplement of*

**Analyzing the chemical composition, morphology and size of ice-nucleating particles by coupling a scanning electron microscope to an offline diffusion chamber**

**Lisa Schneider et al.**

*Correspondence to:* Lisa Schneider ([schneider@geo.tu-darmstadt.de](mailto:schneider@geo.tu-darmstadt.de)); Martin Ebert ([mebert@geo.tu-darmstadt.de](mailto:mebert@geo.tu-darmstadt.de))

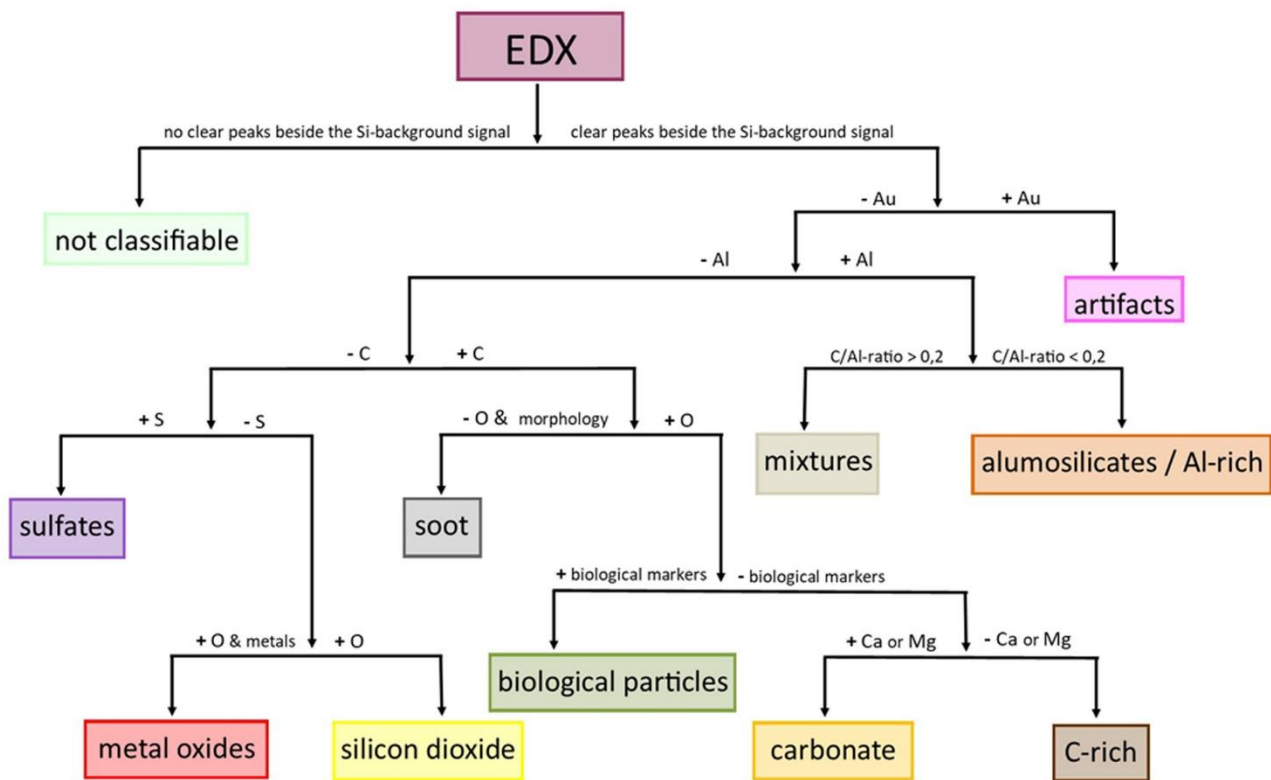

Figure S1: INP classification scheme.

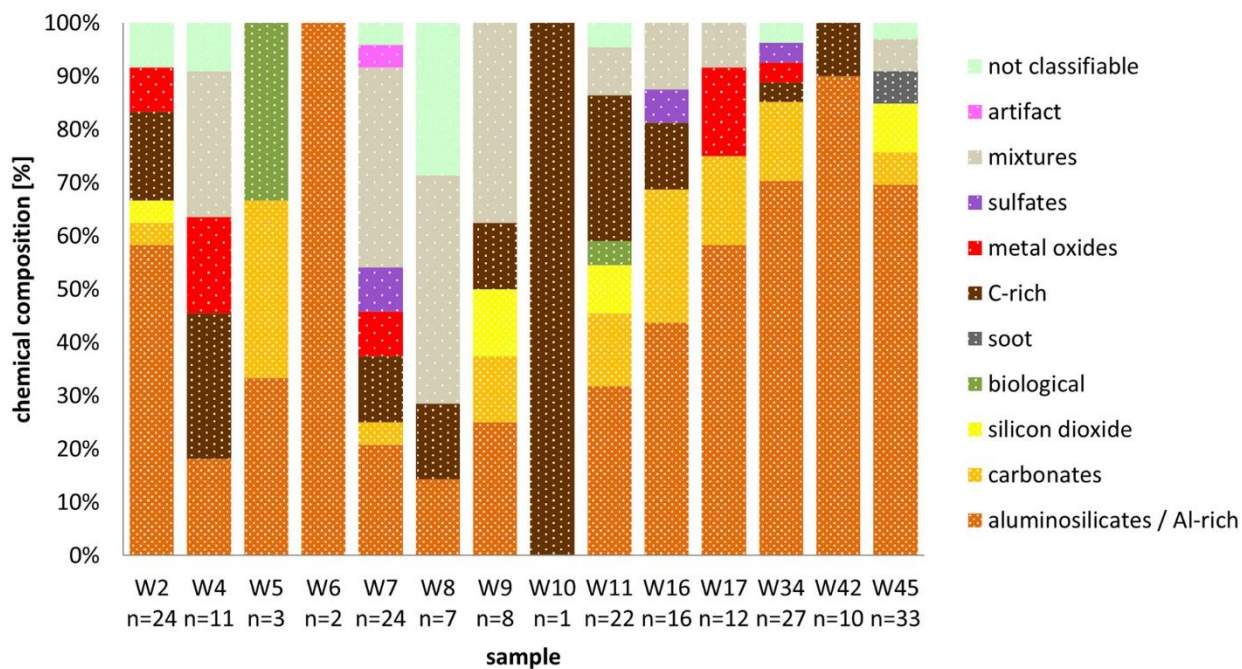

Figure S2: Chemical composition of individual samples from CLACE/INUIT 2017 at the high-altitude research station Jungfraujoch (activated at  $T = -30^{\circ}\text{C}$  and  $\text{RH} = 95 / 97 / 99 / 101 \%$ ) with the number of particles identified per sample (n).
